# Supplementary material for: EGFR controls bone development by negatively regulating mTOR-signaling during osteoblast differentiation
Source: PubMed Central journal article supplement (PMC5988706; doi:10.1038/s41418-017-0054-7), 2018-02-14
Supplement: 41418_2017_54_MOESM3_ESM.pdf [file 41418_2017_54_MOESM3_ESM.pdf]

**Supplemental Figure S1. *Egfr*<sup>-/-</sup> mice show impaired mineralization. Related to Figure 1**

**(A)** Skeletal preparations showing ribcages of 7-day-old WT and KO mice. **(B)** Movat staining of *Egfr*<sup>wt</sup> and *Egfr*<sup>-/-</sup> tibiae at P14; scale: 100µm for both lower (left) and higher magnification (right).

**Supplemental Figure S2. EGFR-deficient osteoblasts show reduced proliferation *in vitro*. Related to Figure 2. (A)** Cumulative growth curve showing reduced cell number of *Egfr*<sup>-/-</sup> OBs; n=2 **(B)** Percentage of late apoptotic OBs as determined by FACS (Annexin V+, 7-AAD+); n=5 **(C)** BrdU incorporation in *Egfr*<sup>wt</sup> and *Egfr*<sup>-/-</sup> OB cultures; n=4 **(D)** Western Blot analysis of WT and KO OBs on day 4 after isolation.

**Supplemental Figure S3. EGFR is efficiently deleted in osteoblasts and long-bones of *Egfr*<sup>AOB</sup> mice. Related to Figure 3.**

**(A)** Western blot analysis of protein lysates obtained from differentiated osteoblasts isolated from bone-marrow of mice with indicated genotypes. **(B)** EGFR IHC staining showing efficient deletion of EGFR in long bones of 6-day-old *Egfr*<sup>ff</sup> Runx2-Cre mice. **(C)** qRT-PCR analysis of RNA isolated from cartilage or bone tissue of 2-day-old *Egfr*<sup>ff</sup> and *Egfr*<sup>AOB</sup> littermates. Expression levels of osteoblastic (*Ocn*, *Opn*) and chondroblastic (*Col2a1*, *Col10a1*) genes were analyzed to confirm correct isolation of the corresponding tissue. **(D)** X-ray image of 3-months-old *Egfr*<sup>wt</sup> and *Egfr*<sup>AOB</sup> littermate showing no differences in overall body length.

**Supplemental Figure S4. EGFR deletion does not affect osteoclastogenesis. Related to Figure 4.**

**(A)** Osteocalcin IHC staining showing reduced levels on the trabecular bone of a 21-days old *Egfr*<sup>AOB</sup> mouse; scales: 100µm (lower magnification) and 20µm (higher

magnification). **(B)** Histomorphometric analysis of WT/ $\Delta$ Ob long-bones at P6, P21, P90 and P210: Quantification of trabecular separation (Tb.Sp), and trabecular thickness (Tb.Th). P6: n=4 WT, 3  $\Delta$ Ob. P21: n=5. P90: n=8 WT, 6  $\Delta$ Ob. P210: n=4 WT, 6  $\Delta$ Ob mice. **(C)** Osteoclast number on the trabecular bone of *Egfr<sup>wt</sup>* and *Egfr <sup>$\Delta$ Ob</sup>* mice at P21 (n=5 WT, 7  $\Delta$ Ob) and P210 (n=5 WT, 7  $\Delta$ Ob) and CTX-1 as measured by ELISA in Serum at P21 (n=7 WT, 5  $\Delta$ Ob) and P210 (n=5 WT, 7  $\Delta$ Ob). **(D)** Western Blot analysis of bone-marrow derived osteoclasts isolated from *Egfr<sup>wt</sup>* and *Egfr<sup>fl/fl</sup>* LysM-Cre mice. **(E)** Osteoclast number on the trabecular bone at P28 (n=4) and CTX-1 serum levels at P90 (n=3 WT, 4  $\Delta$ Oc) in *Egfr<sup>wt</sup>* and *Egfr<sup>fl/fl</sup>* LysM-Cre mice. **(F)** TRAP staining of differentiated osteoclasts isolated from *Egfr<sup>wt</sup>* and *Egfr<sup>-/-</sup>* mice; n=7. **(G)** Osteoclast number on the trabecular bone of *Egfr<sup>wt</sup>* and *Egfr<sup>-/-</sup>* mice. P1: n=6. P7: n=8 WT, 7KO. P14: n=6 WT, 5 KO mice. CTX-1 serum levels at P7 (n=10 WT, 7 KO) and P14 (n=4 WT, 5 KO).

**Supplemental Figure S5. EGFR deletion does not affect IGF-1 and -2 levels *in vitro*. Related to Figure 5.**

**(A)** IGF-1 and IGF-2 protein levels in the supernatant of osteoblasts after 14 days of differentiation. IGF-1: n=4. IGF-2: n=3 WT, 4 KO. **(B)** IHC staining against p-S6 Protein in long-bones of 7-day-old *Egfr<sup>wt</sup>* and *Egfr <sup>$\Delta$ Ob</sup>* littermates. **(C)** Quantification of p-S6 staining; n=5 WT, 6  $\Delta$ Ob.

**Supplemental Figure S6. Rapamycin downregulates EGFR dependent hyper-activation of 4E-BP1 and S6 in osteoblasts. Related to Figure 6.**

**(A)** Western blot analysis of differentiated WT osteoblasts (D21) untreated or cultured with EGF (100ng). **(B)** Western Blot analysis of starved (24h, 0%FCS) differentiated WT osteoblasts (D21) after EGF (20ng/ml) or IGF-1 (100ng/ml) stimulation for 10

minutes. **(C)** IGFBP-3 Elisa of supernatant from starved osteoblast precursor cells after 48h DMSO or Afatinib (1 $\mu$ M) treatment (n=3). **(D)** IGFBP-3 Elisa of serum from 7-months old *Egfr<sup>wt</sup>* and *Egfr<sup>ΔOb</sup>* mice (n=6). **(E)** Western Blot analysis of protein lysates obtained from differentiated primary osteoblasts cultured for 21 days with vehicle (DMSO) or rapamycin (10nM).

**Supplemental Figure S7. Rapamycin treatment prevents mTOR pathway activation in utero. Related to Figure 7.**

**(A)** Dead pups per litter and litter-size on E18.5 after Rapamycin or Vehicle treatment  
**(B)** IHC staining showing phosphorylated S6 protein expression in distal femur sections of Rapamycin/vehicle treated *Egfr<sup>wt</sup>* and *Egfr<sup>-/-</sup>* embryos on E18.5. **(C)** Quantification of length of hypertrophic chondrocyte zone measured in distal femoral growth plates of Rapamycin/Vehicle treated embryos. n=6 WT, 7 KO mice for vehicle and 6 WT, 7 KO mice for rapamycin treatment. **(D,E,F)** mRNA expression levels of **(D)** *Egfr* (n=5 WT, 5 KO mice for vehicle and 3 WT, 3 KO mice for rapamycin treatment) **(E)** *Runx2* and **(F)** *Runx2/Ocn* (n=9 WT, 5 KO mice for vehicle and 7 WT, 5 KO mice for rapamycin treatment) as measured by qRT-PCR from RNA isolated from embryonic femurs at E18.5.

**Supplemental Table S1: Antibodies used for WB and IHC**
